## Design of effective outpatient sentinel surveillance for COVID-19 decision-making: a modeling study

Kok Ben Toh<sup>1,\*</sup>, Manuela Runge<sup>1</sup>, Reese AK Richardson<sup>2</sup>, Thomas J Hladish<sup>3</sup>, Jaline Gerardin<sup>1</sup>

1 Department of Preventive Medicine and Robert J. Havey, MD Institute for Global Health, Northwestern University Feinberg School of Medicine, Chicago, IL, USA.

2 Department of Chemical and Biological Engineering, Northwestern University, Chicago, IL, USA.

3 Department of Biology, University of Florida, Gainesville, FL, USA.

\* To whom correspondence should be addressed: bentoh@northwestern.edu

1

### 2 Abstract

3 **Background:** Decision-makers impose COVID-19 mitigations based on public health indicators such as  
4 reported cases, which are sensitive to fluctuations in supply and demand for diagnostic testing, and  
5 hospital admissions, which lag infections by up to two weeks. Imposing mitigations too early has  
6 unnecessary economic costs, while imposing too late leads to uncontrolled epidemics with unnecessary  
7 cases and deaths. Sentinel surveillance of recently-symptomatic individuals in outpatient testing sites may  
8 overcome biases and lags in conventional indicators, but the minimal outpatient sentinel surveillance  
9 system needed for reliable trend estimation remains unknown.

10 **Methods:** We used a stochastic, compartmental transmission model to evaluate the performance of  
11 various surveillance indicators at reliably triggering an alarm in response to , but not before, a step  
12 increase in transmission of SARS-CoV-2. The surveillance indicators included hospital admissions, hospital  
13 occupancy, and sentinel cases with varying levels of sampling effort capturing 5, 10, 20, 50 or 100% of  
14 incident mild cases. We tested 3 levels of transmission increase, 3 population sizes, and condition of either  
15 simultaneous transmission increase, or lagged increase in older population. We compared the indicators'  
16 performance at triggering alarm soon after, but not prior, to the transmission increase.

17 **Results:** Compared to surveillance based on hospital admissions, outpatient sentinel surveillance that  
18 captured at least 20% of incident mild cases could trigger alarm 2 to 5 days earlier for a mild increase in  
19 transmission and 6 days earlier for moderate or strong increase. Sentinel surveillance triggered fewer false  
20 alarms and averted more deaths per day spent in mitigation. When transmission increase in older  
21 populations lagged increase in younger populations by 14 days, sentinel surveillance extended its lead  
22 time over hospital admissions by an additional 2 days.

23 **Conclusions:** Sentinel surveillance of mild symptomatic cases can provide more timely and reliable  
24 information on changes in transmission to inform decision-makers in an epidemic like COVID-19.

25

26 Keywords: COVID-19, surveillance, modeling, public health indicators

27

### 28 Background

29 COVID-19 is a contagious disease with more than 6 million deaths reported within two years of the global  
30 pandemic starting in early 2020 (1,2). Prior to widespread availability of vaccines, policy makers relied on  
31 non-pharmaceutical interventions or mitigative actions, such as lockdown and business restrictions, to  
32 curb the spread of SARS-CoV-2 (3–7). These actions “flatten the curve”, allowing governments to reduce  
33 the COVID-19 burden to the healthcare system, to maintain the quality of care, and to save lives. Timely  
34 introduction of interventions is important because imposing mitigations too early has unnecessary  
35 economic costs, while imposing too late often fails to control the epidemics and leads to many

36 preventable cases and deaths. The decision criteria for imposing mitigations are often based on public  
37 health indicators such as reported cases and hospital admissions (8).

38 These commonly-used indicators have limitations when used to estimate transmission trends. Cases can  
39 be biased because they are sensitive to fluctuations in supply and demand for diagnostic testing (9–11).  
40 Because the data needed to adjust for this bias is unavailable, cases often provide unreliable  
41 approximation of the transmission trend. Although hospital admission data are less sensitive to  
42 fluctuations in testing demands, hospital admissions lag infection by up to two weeks (12–16). Decisions  
43 made based on trends in hospital admissions thus may result in delayed action to mitigate an incoming  
44 epidemic wave. Furthermore, most COVID-19 patients do not require hospitalization, making admissions  
45 data prone to high variability due to small numbers and reducing its suitability for decision-making.

46 Sentinel surveillance of recently-symptomatic people in outpatient testing sites could overcome these  
47 biases and lags (17). Under outpatient sentinel surveillance, symptom status, symptom onset, and date of  
48 testing site visit are recorded for each case. Sentinel cases here are defined as recently symptomatic  
49 people with symptom onset within 4 days of testing. By focusing on outpatient symptomatic cases, the  
50 influence of asymptomatic testing is removed, and the impact of fluctuations in test availability reduced,  
51 each of which can introduce selection bias. With known symptom onset dates, we can remove care-  
52 seeking and reporting delays, and more accurately infer the infection time series and trends in  
53 transmission.

54 Compared to hospital admissions, sentinel cases have a shorter delay between the point of infection and  
55 detection by the surveillance system. In the event of an increase in transmission, sentinel cases should  
56 thus provide a more timely alarm and enable earlier action against a new epidemic wave. The city of  
57 Chicago, USA, evaluated this surveillance scheme during the COVID-19 pandemic. Even with few  
58 participating testing sites, the Chicago Department of Public Health found that sentinel cases were indeed  
59 more timely than hospital admissions in estimating transmission trends (17). However, the estimated  
60 trends were less certain due to low sampling effort, defined as the proportion of incident symptomatic  
61 infections captured in the surveillance system.

62 Understanding the effects of sampling effort is critical in evaluating the potential feasibility and benefits  
63 of using sentinel surveillance to guide decision-making. Moreover, because hospitalization rates are lower  
64 in younger populations, sentinel surveillance may be especially useful when transmission surges in  
65 younger populations first, before it surges in older populations, as it had been observed in several  
66 epidemic waves in the USA and UK (18,19).

67 Mathematical transmission models can provide insight into the potential benefits of an outpatient  
68 sentinel surveillance system by assessing the effects of sampling effort. Mechanistic models have been  
69 used to understand disease dynamics, forecast hospital needs, and evaluate intervention scenarios  
70 throughout the COVID-19 pandemic (20–25). Modeling has been used to inform decision-makers about  
71 optimal lockdown, reopening and mitigation strategies (26–29). While mathematical models have been  
72 used to compare testing strategies (26,30–32), few modeling studies have been conducted to compare  
73 surveillance designs for timely and appropriate imposition of COVID-19 mitigations (33).

74 To characterize the minimal sampling effort for which an outpatient sentinel surveillance system needed  
75 for reliable estimation of trends in transmission, we use a stochastic compartmental model of SARS-CoV-  
76 2 transmission to evaluate the performance of various surveillance indicators and sampling efforts at  
77 reliably triggering an alarm in response to, but not before, a step increase in transmission rate.

78

## 79 Methods

### 80 SEIR model and simulation framework overview

81 We used a published stochastic SEIR compartmental model (33) to simulate SARS-CoV-2 transmission and  
82 COVID-19 disease states (Figure 1A). The model included multiple symptom statuses (asymptomatic,  
83 presymptomatic, mild, and severe), and multiple severe disease outcomes (requiring hospitalization,  
84 critical illness requiring intensive care unit (ICU) admission, and deaths). We simplified the model by  
85 assuming that only severely ill individuals would isolate, and that isolation led to lowered infectiousness.

86 We use the model parameters from the previous study (33) which set the hospital and ICU lengths-of-stay  
87 based on data from Chicago and from literature during the first COVID-19 wave beginning March 2020  
88 (34,35). This previous study also fitted a time-varying transmission rate to daily ICU census, hospital  
89 census, and reported deaths in Chicago. See SI for details of parameterization.

90 The original model was simulated using Compartmental Modeling Software (36,37). To improve the  
91 computation efficiency in a high performance computing environment, we rewrote and ran the model  
92 using a custom program written in C++ (38) available at (39).

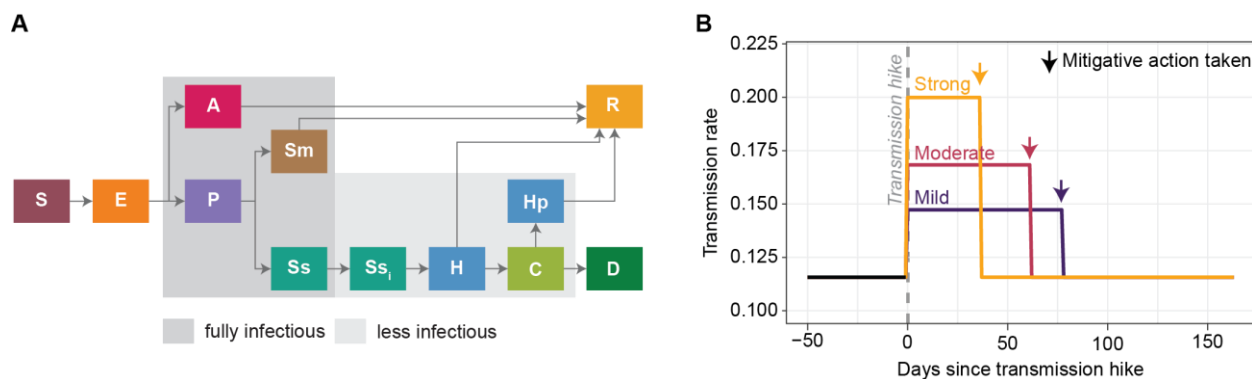

94 **Figure 1.** Model framework used in this study. (A) SEIR model structure to simulate SARS-CoV-2  
95 transmission. S=Susceptible, E=Exposed, A=Asymptomatic, P=Presymptomatic, Sm=Mild symptomatic,  
96 Ss=Severe symptomatic, H=Requires hospitalization, C=Critically ill (ICU), Hp=Hospitalization post-ICU,  
97 D=Death, R=Recovered. All severely symptomatic persons were isolated (S<sub>si</sub>) few days after entering the  
98 state and become less infectious. (B) Simulated transmission rate begins low and steady, then experiences  
99 a step increase (transmission hike) at 3 possible magnitudes to create different strengths of epidemic  
100 waves. When the surveillance indicator reaches a predetermined threshold, mitigative actions are  
101 triggered in the simulation and the transmission rate is decreased to its baseline rate.

102 The model state in August 2020, when transmission was steady and low (33,40), was used as a starting  
103 point for all scenarios. We introduced a step increase in transmission (transmission hike) on 17 September  
104 2020 to induce a new epidemic wave (Figure 1B). We tested three strengths of the transmission hike (mild,  
105 moderate, and strong). Specifically, we hiked the transmission rate parameter from 0.116 to 0.137 (mild),  
106 0.156 (moderate) and 0.179 (strong). The fitted transmission rate in Chicago in its September 2020 wave  
107 was between the moderate and strong transmission hikes.

108 We considered multiple surveillance scenarios for each strength of transmission hike. Each scenario  
109 tracked one surveillance indicator: sentinel cases, hospital admissions, or hospital occupancy. Sentinel  
110 cases were drawn from incident cases in the mild symptomatic compartment. For sentinel cases and  
111 hospital admissions, each indicator was used to calculate the daily instantaneous reproductive number  
112 ( $R_t$ ). When  $R_t$  exceeded 1.05 for 5 consecutive simulation days, an alarm was triggered. Our preliminary  
113 work (See Figure S1 in SI) found that this threshold could trigger mitigations early enough to prevent a

114 transmission surge with relatively low rate of false alarm, i.e., taking mitigative action even before  
115 transmission hike, which is seen as inefficient and imprudent. For hospital occupancy, alarm was triggered  
116 based on a threshold number of patients in beds. We assume that it would take two days for mitigation  
117 to be implemented after an alarm. Once implemented, mitigation immediately reduced the transmission  
118 rate to pre-hike levels, and the transmission rate remained the same for the remainder of the simulation  
119 period. The drop in transmission to pre-hike level was based on the fitted transmission rates in Chicago  
120 after a new round of mitigation policy was imposed to curb the September 2020 wave.

121 All simulations started 50 days before and ended 150 days after the transmission hike.

#### 122 *Simulated surveillance and response scenarios*

123 We considered three types of surveillance indicators to guide decision-making: sentinel cases, hospital  
124 admissions, and hospital occupancy. For sentinel cases, we considered sampling efforts of 5, 10, 20, 50  
125 and 100%. Sampling effort was defined as the percentage of all mildly symptomatic cases ( $S_m$ ), regardless  
126 of isolation status, that were captured by surveillance. Sentinel cases were calculated by downsampling  
127 daily new incident mild symptomatic cases by symptom onset date using a binomial random draw with  
128 corresponding probability. Hospital admissions were measured as the daily new incident admissions to  
129 the H compartment on each simulation (i.e. the daily rate of flow from compartment  $SS_i$  to compartment  
130 H). Hospital occupancy was the total number of people in the H and  $H_p$  compartments.

131 On each simulation day, the time series of sentinel surveillance indicators from the simulation start to 3  
132 days prior was used to calculate  $R_t$  and to evaluate if mitigations should be imposed. The 3-day offset  
133 accounted for delays in data collection. For any given symptom onset date, completing the data would  
134 require at least 6 days: sentinel cases counted symptomatic people who were tested within 4 days of  
135 symptom onset, and we assumed 2 days of test turnaround time. However, this delay can be shortened  
136 to 3 days with statistical nowcasting (17,41,42) assuming a 2-day turnaround and that the full numbers of  
137 symptomatic cases can be reliably estimated from symptomatic cases within 1 day of symptom onset.

138 For hospital admissions, we assumed that the data collection delay was 5 days, based on delays associated  
139 with admission data in Chicago (17). For hospital occupancy, we assumed data collection delay was only  
140 one day. The threshold number of patients in beds for triggering alarm was met when occupancy  
141 exceeded 152 per 1 million people for the last 3 days. Occupancy thresholds were chosen based on levels  
142 observed in Chicago in October 2020 when mitigative actions were announced.

143 We estimated  $R_t$  using the Python package `epyestim` (43–45). In this package, the input data series is first  
144 bootstrapped and a locally weighted scatterplot smoothing (LOWESS) filter is applied to each of the  
145 bootstrapped data series for smoothing. We used a smoothing window of 21 days for all indicators except  
146 sentinel surveillance with sampling effort of 5%, which required a 28-day smoothing window to stabilize  
147 the  $R_t$  trajectory. We approximated the generation time using the serial interval distribution estimated by  
148 (35). Time between infection and symptom onset or hospitalization was estimated using Chicago data  
149 (see SI for details).

150 We simulated 500 realizations for each combination of the 3 transmission hike strengths (mild, moderate,  
151 and strong); 7 indicators (sentinel cases with sampling effort of 5, 10, 20, 50 and 100%, hospital admission  
152 and hospital occupancy); and 3 population sizes (1.25 million, 2.5 million, and 5 million); for a total of  
153 31,500 simulations.

#### 154 *Timeliness, false alarm rate, deaths averted, and extra days in mitigation*

155 We compared the performance of each indicator by measuring how timely they were in triggering the  
156 alarm for taking mitigative actions. Performance was evaluated by calculating the median and 90<sup>th</sup>  
157 percentile of day of triggering alarm among the 500 realizations for each surveillance scenario, as well as

158 the false alarm rate. Lead time of one indicator over another was calculated from the number of days  
159 between the median dates (or 90<sup>th</sup> percentile dates) of triggering alarm. The 90<sup>th</sup> percentile metric  
160 reflected the tail-end performance of the indicators and was less perturbed by false alarms than using  
161 median. False alarm rates were the proportion of realizations (out of 500) that met criteria for triggering  
162 alarm prior to the date of the transmission hike, hence too early.

163 To quantify the benefits and costs of using the surveillance indicators in our experiment, we calculated  
164 the number of deaths averted and the number of extra days in mitigation in each simulation run. We used  
165 hospital occupancy as the reference scenario as it was the slowest to trigger alarm. Each realization in a  
166 surveillance scenario was compared against the realization with the same random number seed in the  
167 hospital occupancy scenario. We calculated the total number of deaths that occurred throughout the  
168 simulation period (50 days before and 150 days after the transmission hike). Deaths averted was the  
169 difference between the deaths in the reference and the comparison realizations. The number of extra  
170 mitigation days was calculated by subtracting the day of triggering alarm in the comparison realization  
171 from that of the reference, which are matched by the random number generator seed. The mean deaths  
172 averted and extra mitigation days among all 500 realizations was used to characterize the performance  
173 of the surveillance indicator.

174 We measured the efficiency of each surveillance indicator by calculating the number of deaths averted  
175 per extra day of mitigation relative to hospital occupancy. This was calculated by dividing the average  
176 deaths averted by average extra mitigation days.

#### 177 *Age-structured SEIR model*

178 The age-structured model consisted of two SEIR submodels, representing two age groups: below and  
179 above 40 years old. The two age groups have similar size in Chicago (55% vs 45%), according to American  
180 Community Survey 2016 to 2020 5-year estimates (46). The structure of each submodel was the same as  
181 in Figure 1A. We assumed 80% of contacts were within-group and 20% were between-group. This inter-  
182 group contact rate is lower than that estimated from pre-pandemic period (47,48) and was chosen to  
183 maintain distinctive transmission trends between age groups such that we could evaluate the ability of  
184 outpatient sentinel surveillance to detect distinct trends in younger ages. As informed by (23), the  
185 probability of asymptomatic infection given exposure was 59% and 19% for the under-40 and above-40  
186 age groups, respectively. The probability a symptomatic infection was severe was 3% and 12% for the  
187 under-40 and above-40 age group, respectively, based on CDC's risk by age group estimates (49). See SI  
188 for more details on the parameterization. We assumed that the transmission rate for the above-40 age  
189 group was 65% that of the below-40 age group due to a lower overall level of social contact. All other  
190 parameters were the same across age groups.

191 We considered the same scenarios of transmission hikes and surveillance indicators as in the base model.  
192 We simulated transmission under two scenarios: one where both age groups experienced the  
193 transmission hike simultaneously and one where hike for the above-40 group lagged the hike in the under-  
194 40 group by 14 days. We used a population of 2.5 million individuals and a moderate transmission hike.  
195 We ran 500 realizations for each surveillance scenario, 2 lags, and 6 surveillance indicators resulting in  
196  $500 \times 2 \times 6 = 6000$  simulations. Indicators and criteria for mitigative action were defined as in the base  
197 model scenarios. We exclude the hospital occupancy indicator since the purpose of this experiment is to  
198 compare the timeliness between sentinel cases and hospital admissions and that no costs and benefits  
199 analysis was conducted.

200

201 **Results**

202 To compare the performance of sentinel surveillance of outpatient COVID-19 cases compared to hospital-  
 203 based indicators, we simulated a step increase in transmission (“transmission hike”) and evaluated how  
 204 quickly and reliably each indicator could trigger an alarm for taking mitigative action while avoiding  
 205 premature alarms. We compared sentinel surveillance systems that captured between 5% (low sampling  
 206 effort) and 100% (high sampling effort) of all mild symptomatic cases. For sentinel surveillance and  
 207 hospital admissions, each data series was used to estimate the instantaneous reproductive number  $R_t$ ,  
 208 and the threshold for alarm was met when  $R_t > 1.05$  for the previous 5 days. For hospital occupancy, the  
 209 thresholds were set at exceeding 152 per 1 million for the previous 3 days and were based on levels  
 210 observed in Chicago in October 2020 when mitigative actions were announced.

211 *Sentinel surveillance has an operational recency advantage over hospital admissions*

212 Before the transmission hike, all indicators remained steady (Figure 2A). Simulated data series of hospital  
 213 admissions and sentinel cases with low sampling effort were noisier relative to the mean than for hospital  
 214 occupancy or sentinel cases with high sampling effort. After the transmission hike, all indicators increased  
 215 until mitigative action was taken. Sentinel surveillance indicators, which report on newly symptomatic  
 216 individuals, generally peaked the earliest, followed by hospital admissions and hospital occupancy.

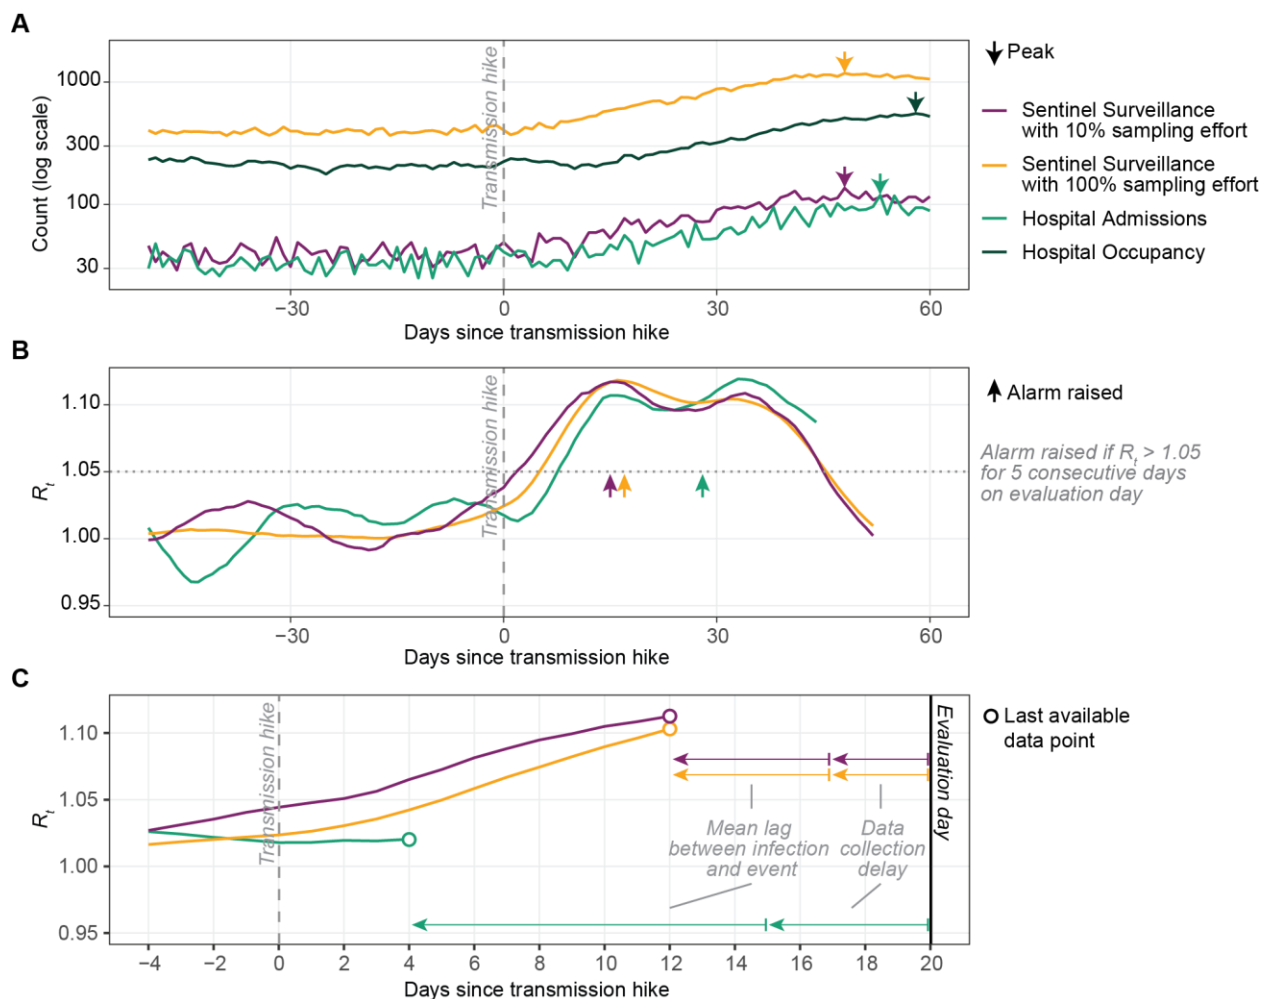

217 **Figure 2.** Example trajectories of COVID-19 indicators and their derived  $R_t$ , from a single, representative  
 218 simulation with population 2.5 million, moderate transmission hike, and alarm triggered by hospital  
 219

220 occupancy. (A) Indicators are steady before and rise rapidly after the transmission hike. Arrows: peak for  
221 each indicator. Vertical dashed line: day of transmission hike. (B)  $R_t$  estimated based on each indicator,  
222 evaluated on day 60 after the transmission hike.  $R_t$  could not be estimated using hospital occupancy.  
223 Horizontal dotted line: threshold ( $R_t=1.05$ ) for triggering alarm. Arrows: day alarm would have been  
224 triggered based on monitoring  $R_t$  for each indicator. (C) Real-time evaluation of  $R_t$  demonstrates the  
225 operational recency advantage of sentinel surveillance over hospital admissions. Example shown for  
226 evaluation day of 20 days after the transmission hike.

227 Data from hospital admissions and from sentinel surveillance with 10% sampling effort produced  $R_t$   
228 estimates that fluctuated more than  $R_t$  estimates produced from data from sentinel surveillance with  
229 100% sampling effort (Figure 2B). In Figure 2B prior to the transmission hike,  $R_t$  estimated from hospital  
230 admissions or sentinel surveillance with 10% sampling effort ranged from 0.97 to 1.03 and from 0.99 to  
231 1.04, fluctuating substantially above 1 and below 1 while  $R_t$  estimated from sentinel surveillance with  
232 100% sampling effort remained flat at close to 1 (1.0 to 1.02).

233 On a given evaluation date,  $R_t$  cannot be estimated for the most recent 8 days for sentinel surveillance  
234 (Figure 2C). For hospital admissions, the most recent 16 days cannot be estimated because the infection-  
235 to-hospitalization and the hospitalization-to-report lags are both greater. The modeled 8-day operational  
236 recency advantage of sentinel surveillance over hospital admissions is sensitive to the assumed lags and  
237 could decrease if data collection delays for hospital data or lag between infection and admission were  
238 reduced.

239 *Sentinel surveillance raises alarms sooner and with a lower false alarm rate*

240 To reduce time spent under mitigation, a good indicator should consistently meet the threshold for  
241 triggering alarm closely after, but not before, the transmission hike. False alarms are situations where the  
242 threshold was met prior to the transmission hike. For each simulation, we extracted the day on which the  
243 criteria for triggering alarm was met.

244 Compared to hospital admissions or hospital occupancy indicators, use of sentinel surveillance indicators  
245 could result in sooner alarms after the transmission hike and a lower rate of false alarms, depending on a  
246 few key factors (Figure 3). Sentinel surveillance most outperformed hospitalization indicators for larger  
247 changes in transmission, larger populations, or higher sampling effort. In a population of 2.5 million,  
248 sentinel surveillance with 10 to 100% sampling effort led hospital admissions in triggering alarms by a  
249 median of 2 to 5 days for a mild transmission hike and 6 days for moderate and strong transmission hikes.  
250 Although sentinel surveillance with 5% sampling effort led hospital admissions by even more days, this  
251 was mainly because of the high false alarm rate. When comparing the 90<sup>th</sup>-percentile day of triggering  
252 alarm, sentinel surveillance led hospital admissions by 4 to 7 days for a mild transmission hike and 7 to 9  
253 days for moderate and strong transmission hikes. The lead time of sentinel surveillance with 5 to 100%  
254 sampling effort over hospital admissions was similar for populations of 2.5 and 5 million. The lead time  
255 advantage in terms of median day of triggering alarm disappeared in the population of 1.25 million, due  
256 to higher rates of false alarms. Nevertheless, the lead time advantage in terms of 90<sup>th</sup>-percentile day of  
257 triggering alarm remained similar to other population sizes under moderate and strong transmission  
258 hikes.

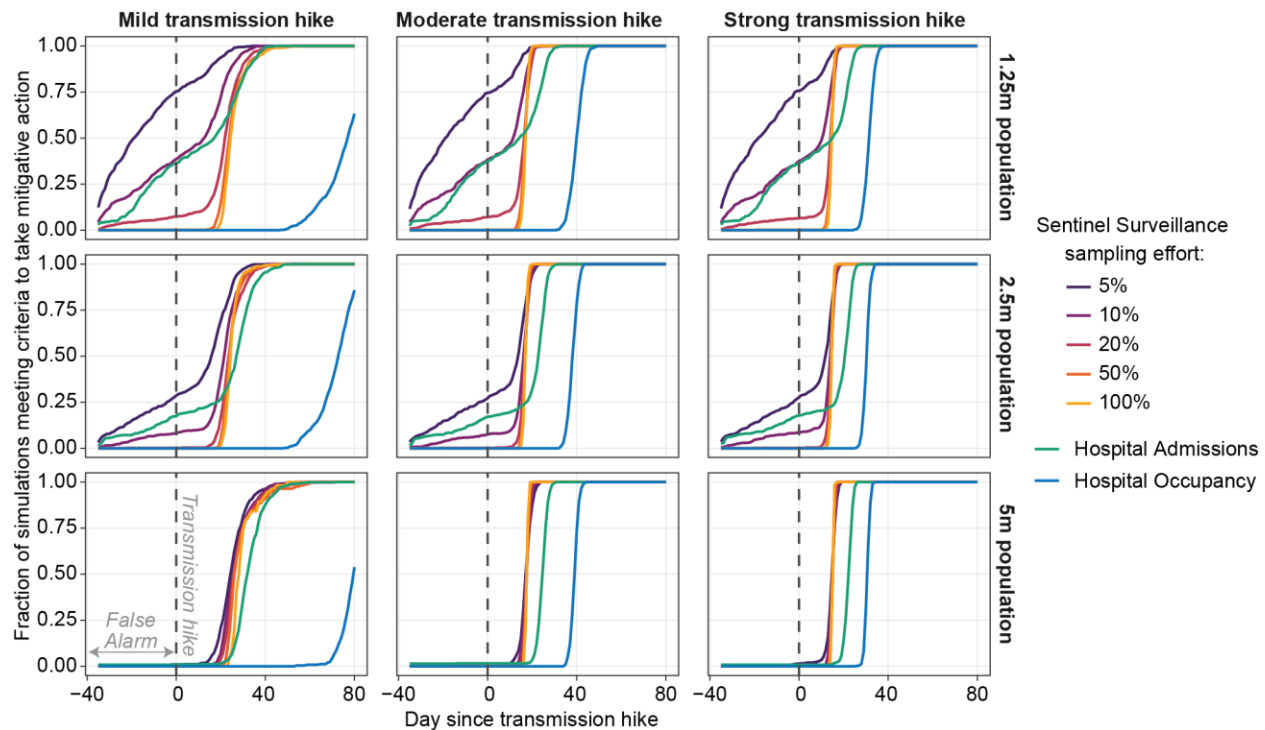

259

260 **Figure 3.** The cumulative distribution of the day on which criteria to trigger alarm was met, by indicator,  
 261 strengths of transmission hike (columns), and population size (rows).

262 The false alarm rate, or percentage of realizations that raised a false alarm, was substantial for sentinel  
 263 surveillance with 5% or 10% sampling effort and for hospital admissions. The false alarm rate was similar  
 264 regardless of the size of the transmission hike and decreased with increasing sentinel surveillance  
 265 sampling effort. Across all transmission hikes tested and in a population of 2.5 million, the false alarm rate  
 266 was 27 to 28%, 8 to 9%, and 17 to 18% respectively for sentinel surveillance sampling effort of 5%, 10% ,  
 267 and for hospital admissions. The false alarm rate was lower in a simulated population of 5 million: sentinel  
 268 surveillance with 5% sampling effort and hospital admissions each had only 1 to 2% false alarm rate and  
 269 other indicators had negligible false alarm rates. In a smaller population of 1.25 million, false alarm rates  
 270 were higher: even sentinel surveillance with 20% sampling effort had a false alarm rate of 7%.

271 The hospital occupancy indicator resulted in the latest alarm of all indicators considered and did not result  
 272 in any false alarms. Under the mild transmission hike, alarm was raised 80 days after the transmission hike  
 273 for 63, 86, and 54% of realizations for populations of 1.25, 2.5 and 5 million respectively.

274 These results assume that detecting mild symptomatic cases does not lead to isolating behavior and hence  
 275 lowered infectiousness. We modified the model such that 30% of the mild symptomatic cases were  
 276 detected and isolated, and that  $\frac{2}{3}^{\text{rd}}$  of these detected mild cases were captured by the sentinel  
 277 surveillance system. We compared the performance of sentinel surveillance with 20% sampling effort and  
 278 hospital admissions. We found that the outcomes were similar to that of previous results (Figure S2 in SI),  
 279 suggesting the timeliness advantage of sentinel surveillance persists regardless of isolation.

280 *Sentinel surveillance of 20% or more effort averts more deaths with fewer extra days of mitigation*

281 To assess the costs and benefits of using sentinel surveillance or hospital admissions indicators to trigger  
 282 alarms and hence mitigation actions, we compared the number of additional days spent under mitigation  
 283 (cost) and number of deaths averted (benefit) relative to a baseline scenario with hospital occupancy as  
 284 indicator. Days under mitigation and deaths were each aggregated over the period from 50 days before



285 to 150 days after the transmission hike. The most efficient indicator would be one that maximizes deaths  
 286 averted while minimizing extra days of mitigation.

287 As expected, there was a positive relationship between number of additional days of mitigation and  
 288 deaths averted (Figure 4A). Spending more time under mitigation always had positive impact on deaths  
 289 averted. Sentinel surveillance with 20, 50, and 100% sampling effort resulted in similar deaths averted  
 290 and additional days of mitigation, indicating that increasing sampling effort above 20% did not  
 291 substantially change system outcomes. Within the same size of transmission hike, decreasing sampling  
 292 effort for sentinel surveillance, or the use of hospital admission, resulted in larger variation in both deaths  
 293 averted and additional days of mitigation. The higher variability in using hospital admissions can be  
 294 attributed to a higher false alarm rate, which imposes mitigation too soon, and late imposition of  
 295 mitigations.

296 As the size of the transmission hike increased, the number of deaths averted also increased, whereas  
 297 additional days of mitigation decreased. The mean deaths averted per mean additional day spent in  
 298 mitigation, which demonstrates the efficiency of mitigation, are shown in Figure 4B. Deaths averted per  
 299 additional day of mitigation decreased with higher false alarm rates under the moderate and strong  
 300 transmission hikes. For sentinel surveillance with 20% or more effort, the average deaths averted per  
 301 additional day of mitigation was 10.3, 26.5 and 46.1 for mild, moderate, and strong transmission hikes  
 302 respectively. For hospital admissions, the average deaths averted per additional day of mitigation was 9.7,  
 303 23.1, and 36.0; for sentinel surveillance with 5% effort average deaths averted per additional day of  
 304 mitigation was 9.5, 21.8, and 34.8 for mild, moderate, and strong transmission hikes respectively.

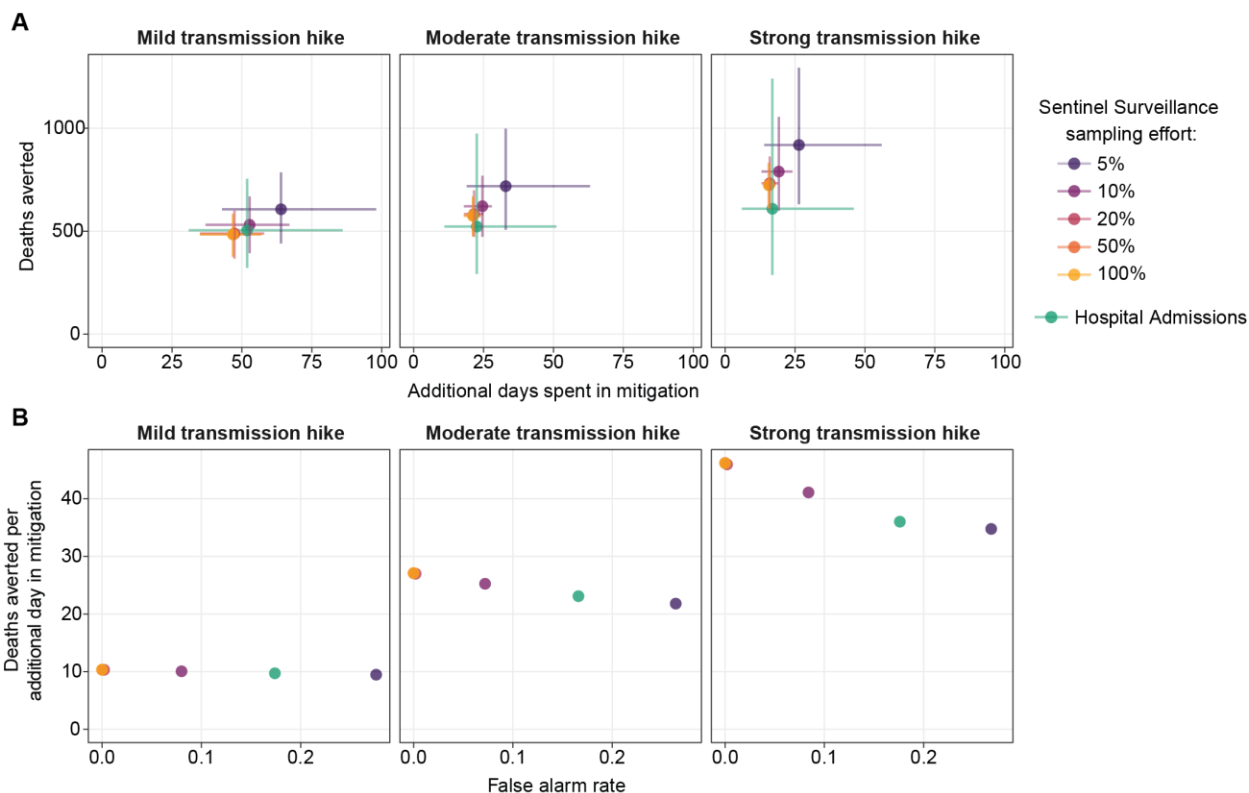

305  
 306 **Figure 4.** Deaths averted and additional days spent in mitigation for using sentinel surveillance or hospital  
 307 admissions indicators as the trigger for imposing mitigation measures, under 3 levels of transmission hikes  
 308 in a population of 2.5 million, compared with using hospital occupancy. (A) Mean and 90% confidence  
 309 interval of deaths averted and additional days of mitigation, from 500 stochastic realizations per indicator.

310 (B) Average deaths averted per average additional day in mitigation for each indicator and its relationship  
311 with false alarm rate. False alarm rate is the proportion of simulations in which action is taken before the  
312 transmission hike.

313 *Timeliness advantage of sentinel surveillance widens when transmission increases first in younger ages*

314 Changes in transmission may not affect all age groups simultaneously. We simulated SARS-CoV-2  
315 transmission in an age-structured model that included two age groups, one below and one above 40 years  
316 of age. We considered two scenarios: one where both age groups experienced the step increase in  
317 transmission simultaneously and one where the step increase for the above-40 group lagged by 14 days  
318 (Figure 5A). We compared the performance of sentinel surveillance with various sampling efforts to  
319 hospital admissions at responding quickly while minimizing false alarms.

320 Alarm was triggered later in scenarios when the transmission hike occurred first in the under-40 age group  
321 (Figure 5B). When the age groups experienced the transmission hike simultaneously, sentinel surveillance  
322 with 20% or more effort triggered alarm sooner than hospital admissions by a median of 6 days, and a  
323 90<sup>th</sup>-percentile of 7 days. When the transmission hike occurred first in the under-40 group, sentinel  
324 surveillance with greater than 20% sampling led hospital admissions by a median of 7 days, with a 90<sup>th</sup>  
325 percentile lead time of 9 days. Overall, staggering the transmission hike to occur 2 weeks earlier in the  
326 younger age group increased the lead time of sentinel surveillance over hospital admissions by 1 to 2 days.

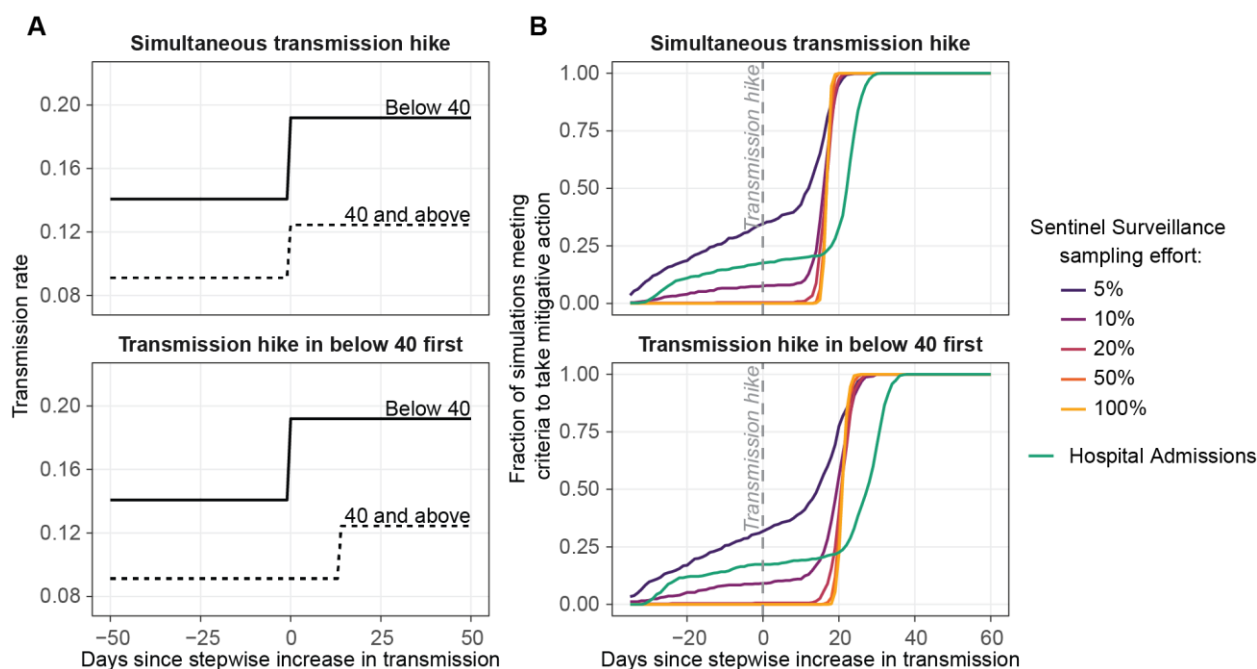

327  
328 **Figure 5.** Performance of sentinel surveillance and hospital admissions indicators under scenarios when  
329 two age groups (below and above 40 years of age) simultaneously experience a transmission hike or when  
330 a transmission hike occurs 14 days earlier in people below 40 years of age. (A) Transmission rate profile  
331 for the two scenarios modeled in the age-structured SEIR model. (B) The cumulative distribution of the  
332 day on which criteria to trigger alarm was met, using each indicator under the two transmission hike  
333 scenarios. Simulations are conducted on population of 2.5 million experiencing a moderate transmission  
334 hike with 500 realizations.

## 335 Discussion

336 Sentinel surveillance of outpatient recently-symptomatic cases provides a useful indicator to alert  
337 decision-makers about increases in SARS-CoV-2 transmission. Compared with hospital admissions,  
338 sentinel surveillance is less variable, reduces the false alarm rate, and provides data with shorter lag times,  
339 which allows faster reactions to changes. The minimal sampling effort required for reliable sentinel  
340 surveillance indicators varies according to the population size and size of transmission increase, but  
341 generally capturing 20% of mild symptomatic cases within the surveillance system was sufficient.

342 The 8-day operational recency of outpatient sentinel surveillance over hospital admissions—that sentinel  
343 surveillance can provide up to 8 days' advance warning of changes in transmission compared with hospital  
344 admissions data—can be attributed to shorter delay between infection and symptom onset, as well as the  
345 use of statistical nowcasting. Nowcasting has been widely used to estimate the complete case count using  
346 incomplete time series for COVID-19 and other diseases (41,42,50–52). In Chicago, nowcasting could be  
347 applied to shorten the data collection delay for sentinel cases, but not hospital admissions due to  
348 inconsistent backfilling (17). Improvements in reporting speed of hospital admissions data would reduce  
349 the operational recency of sentinel surveillance to as little as 5 days.

350 Our study highlights that indicators with small counts, e.g., less than 50 per day, can have limited utility in  
351 decision making due to their high variability, which leads to a high false alarm rate. These factors can  
352 result in unnecessary restrictions, reduce decision makers' confidence in taking action, and harm public  
353 trust in the health system. At a given population size, small counts in sentinel surveillance can be  
354 overcome by increasing sampling effort. On the other hand, hospital admissions are inherently limited by  
355 severe disease rates of COVID-19.

356 We defined the threshold for triggering alarm as  $R_t > 1.05$  for 5 consecutive days. Setting the threshold  
357 higher would have reduced the number of deaths averted and decreased the number of days spent in  
358 mitigation, whereas a lower threshold would have led to more false alarms. 1.05 was selected as an  
359 acceptable middle ground. We expect that factors affecting sentinel surveillance performance would be  
360 similar if a different threshold were chosen.

361 While false alarms may incur economic costs or reduce public confidence in the decision-making process,  
362 they resulted in the most deaths averted. However, false alarms reduced the efficiency of mitigative  
363 action, measured as deaths averted per additional day spent in mitigation. When we removed simulations  
364 with false alarms, efficiency of surveillance based on hospital admissions increased or slightly surpassed  
365 the efficiency of sentinel surveillance (Figure S3 in SI). Nevertheless, the overall deaths averted for hospital  
366 admissions was 25 to 35% lower than for high-effort sentinel surveillance under a moderate or strong  
367 increase in transmission. At similar efficiency, the operational recency of sentinel surveillance over  
368 hospital admissions led to saving more lives.

369 Hospitalization indicators are more effective at monitoring the transmission in older age groups than in  
370 the population at-large. For example, 80% of all COVID-19 hospitalizations in Chicago were older than 40  
371 years old whereas only 50% of the general population was older than 40 years (53). Outpatient sentinel  
372 surveillance thus holds an additional timeliness advantage over hospital admissions when the younger  
373 population experiences an increase in transmission earlier than the older population. Situations like this  
374 were common throughout this pandemic, e.g., in Illinois and Florida, USA, during their winter and summer  
375 2020 wave (18), and in England UK during the Omicron wave in late 2021 (19). Sentinel surveillance for  
376 early warning could be especially useful when transmission first increases in demographic group less  
377 prevalent in hospitalization data.

378 We chose a between-age group contact rate of 20% to ensure that cases and hospitalizations in those age  
379 below 40 were distinctively elevated before those above 40. More contacts between age groups would

380 disintegrate this pattern and erase the additional advantage conveyed by the sentinel surveillance over  
381 hospital admissions; fewer contacts would boost the advantage. This between-group contact rate is lower  
382 than the estimate of 30% that is inferred from pre-pandemic age contact matrices (47,48), which might  
383 have changed significantly due to the impact of public health measures and reduction of number of social  
384 contacts (54).

385 A major challenge in implementing sentinel surveillance is to achieve the minimal sampling effort needed  
386 for decision making. In USA and other countries where tests were increasingly abundant after the early  
387 weeks of pandemic, attaining 20% sampling effort could have been feasible provided that all outpatient  
388 testing sites were reliably recording symptom status and onset dates. The ascertainment rate for  
389 symptomatic illnesses exceeded 30% in these countries (55–59). Since at-home antigen testing has  
390 become widely available in many locales, new approaches to surveillance will likely be needed. For  
391 example, population-based survey of symptom information, such as that of UK’s Office of National  
392 Statistics (60), could be implemented to aid this sentinel surveillance model. Self-reported symptom  
393 tracking programs such as ZOE health study (61), COVID Symptom (62) and COVID Control (63) may  
394 compliment the surveillance model, although maintaining their longevity and public interests remain  
395 challenging (64).

396 If questions on patients’ symptom status and symptom onset date were embedded into patient intake  
397 forms since the inception of the testing programs, then the cost of implementing outpatient sentinel  
398 surveillance would be very low. However, changing an existing system to incorporate new questions may  
399 incur significant technological and coordination costs, as it would require a change in frontend surveys  
400 and databases across multiple testing vendors.

401 Our study did not compare the utility of sentinel surveillance against reported cases and test positivity  
402 rates, despite the latter two indicators’ prominent role in the COVID-19 pandemic. Simulating the time-  
403 varying biases in cases and test positivity rate is challenging due to the lack of understanding in these  
404 indicators’ biases over time, and demand for tests can fluctuate in response to population perception of  
405 transmission rates. Implementing outpatient sentinel surveillance can provide important data to correct  
406 the biases in cases and test positivity rates, increasing their utility for decision-making.

407

## 408 **Conclusions**

409 Our study shows that sentinel surveillance of recently-symptomatic cases in outpatient testing sites could  
410 be feasible, prudent, and effective for informing situational awareness in an epidemic like COVID-19. With  
411 adequate sampling effort of at least 20% of mild symptomatic cases captured by surveillance, sentinel  
412 cases provide accurate, timely warning of increases in transmission, even under heterogeneous  
413 transmission conditions. In practice, decisions should not be based on only one indicator: cross-checking  
414 with other indicators will provide more confidence that action should or should not be taken.

415

### **List of abbreviations**

USA: United States of America

UK: United Kingdom

SEIR: Susceptible exposed infected recovered

ICU: Intensive care unit

LOWESS: Locally weighted scatterplot smoothing

CDC: Centers for Disease Control and Prevention

## **Declarations**

*Ethics approval and consent to participate*

Not applicable

*Consent for publication*

Not applicable

*Availability of data and materials*

Code used to simulate SARS-CoV-2 transmission and sentinel surveillance are available at <https://github.com/numalariamodeling/covid-sentinel-surveil>. Datasets used in this study were generated using the code in the repository.

*Competing interests*

The authors declare that they have no competing interests.

*Funding*

KBT and JG were supported by the Peter G. Peterson Foundation Pandemic Response Policy Research Fund. MR and JG were supported by the MIDAS rapid response grant (MIDASNI2020-4). RR was supported by a grant from NIGMS (T32 GM008449).

*Authors' contributions*

Conceived the study: KBT, MR, JG. Developed model and code: KBT, MR, RR, TH. Wrote main manuscript text: KBT, JG. All authors edited and reviewed the manuscript.

*Acknowledgments*

We thank Jiayi Gu, Josephine Harter, Vikram Thanigaivelan, Laith Kassiseh and Jamie Woodworth for their preliminary work. This study would not have been possible without the computational resources and staff support from the Quest high performance computing facility at Northwestern University.

## **Supplementary Information**

*Additional file 1 — Details of SEIR model fitting and parameters, and supplemental figures*

Specific values for the model parameters, and figures showing (a) timeliness performance of sentinel surveillance and hospital admissions when detection of mild cases leads to isolation, and (b) efficiency of surveillance indicators when stochastic realizations with false alarms for hospital admissions were removed.

## References

1. WHO. WHO Coronavirus (COVID-19) Dashboard [Internet]. [cited 2022 Aug 16]. Available from: <https://covid19.who.int>
2. Dong E, Du H, Gardner L. An interactive web-based dashboard to track COVID-19 in real time. *The Lancet Infectious Diseases*. 2020 May;20(5):533–4.
3. Ahlers M, Aralis H, Tang W, Sussman JB, Fonarow GC, Ziaieian B. Non-pharmaceutical interventions and covid-19 burden in the United States: retrospective, observational cohort study. *BMJ Medicine*. 2022 Aug 1;1:e000030.
4. Leech G, Rogers-Smith C, Monrad JT, Sandbrink JB, Snodin B, Zinkov R, et al. Mask wearing in community settings reduces SARS-CoV-2 transmission. *Proc Natl Acad Sci USA*. 2022 Jun 7;119(23):e2119266119.
5. Liu X, Xu X, Li G, Xu X, Sun Y, Wang F, et al. Differential impact of non-pharmaceutical public health interventions on COVID-19 epidemics in the United States. *BMC Public Health*. 2021 May 21;21(1):965.
6. Rebmann T, Loux TM, Arnold LD, Charney R, Horton D, Gomel A. SARS-CoV-2 Transmission to Masked and Unmasked Close Contacts of University Students with COVID-19 — St. Louis, Missouri, January-May 2021. *MMWR Morb Mortal Wkly Rep*. 2021 Sep 10;70(36):1245–8.
7. Van Dyke ME, Rogers TM, Pevzner E, Satterwhite CL, Shah HB, Beckman WJ, et al. Trends in County-Level COVID-19 Incidence in Counties With and Without a Mask Mandate — Kansas, June 1–August 23, 2020. *MMWR Morb Mortal Wkly Rep*. 2020 Nov 27;69(47):1777–81.
8. Yang H, Sürer Ö, Duque D, Morton DP, Singh B, Fox SJ, et al. Design of COVID-19 staged alert systems to ensure healthcare capacity with minimal closures. *Nature Communications* 2021 12:1. 2021 Jun;12(1):1–7.
9. Ibrahim NK. Epidemiologic surveillance for controlling Covid-19 pandemic: types, challenges and implications. *J Infect Public Health*. 2020 Nov;13(11):1630–8.
10. Rader B, Astley CM, Sy KTL, Sewalk K, Hswen Y, Brownstein JS, et al. Geographic access to United States SARS-CoV-2 testing sites highlights healthcare disparities and may bias transmission estimates. *J Travel Med*. 2020 Nov 9;27(7):taaa076.
11. Moss R, Zarebski AE, Carlson SJ, McCaw JM. Accounting for Healthcare-Seeking Behaviours and Testing Practices in Real-Time Influenza Forecasts. *Trop Med Infect Dis*. 2019 Jan 11;4(1):E12.

12. Tian S, Chang Z, Wang Y, Wu M, Zhang W, Zhou G, et al. Clinical Characteristics and Reasons for Differences in Duration From Symptom Onset to Release From Quarantine Among Patients With COVID-19 in Liaocheng, China. *Front Med*. 2020;7:210.
13. Alene M, Yismaw L, Assemie MA, Ketema DB, Gietaneh W, Birhan TY. Serial interval and incubation period of COVID-19: a systematic review and meta-analysis. *BMC Infectious Diseases*. 2021 Mar 11;21(1):257.
14. Lauer SA, Grantz KH, Bi Q, Jones FK, Zheng Q, Meredith HR, et al. The Incubation Period of Coronavirus Disease 2019 (COVID-19) From Publicly Reported Confirmed Cases: Estimation and Application. *Ann Intern Med*. 2020 May 5;172(9):577–82.
15. Yang X, Yu Y, Xu J, Shu H, Xia J, Liu H, et al. Clinical course and outcomes of critically ill patients with SARS-CoV-2 pneumonia in Wuhan, China: a single-centered, retrospective, observational study. *The Lancet Respiratory Medicine*. 2020 May 1;8(5):475–81.
16. Gostic KM, McGough L, Baskerville EB, Abbott S, Joshi K, Tedijanto C, et al. Practical considerations for measuring the effective reproductive number,  $R_t$ . *PLOS Computational Biology*. 2020 Dec 10;16(12):e1008409.
17. Richardson R, Jorgensen E, Arevalo P, Holden TM, Gostic KM, Pacilli M, et al. Tracking changes in SARS-CoV-2 transmission with a novel outpatient sentinel surveillance system in Chicago, USA. *Nat Commun*. 2022 Sep 22;13(1):5547.
18. Holden TM, Richardson RAK, Arevalo P, Duffus WA, Runge M, Whitney E, et al. Geographic and demographic heterogeneity of SARS-CoV-2 diagnostic testing in Illinois, USA, March to December 2020. *BMC Public Health*. 2021 Dec;21(1):1–13.
19. Office for National Statistics. Coronavirus (COVID-19) Infection Survey, UK: 14 January 2022 [Internet]. [cited 2022 Aug 16]. Available from: <https://www.ons.gov.uk/peoplepopulationandcommunity/healthandsocialcare/conditionsanddiseases/bulletins/coronaviruscovid19infectionsurveypilot/14january2022#age-analysis-of-the-number-of-people-who-had-covid-19>
20. Campillo-Funollet E, Van Yperen J, Allman P, Bell M, Beresford W, Clay J, et al. Predicting and forecasting the impact of local outbreaks of COVID-19: use of SEIR-D quantitative epidemiological modelling for healthcare demand and capacity. *Int J Epidemiol*. 2021 Aug 30;50(4):1103–13.
21. Delli Compagni R, Cheng Z, Russo S, Van Boeckel TP. A hybrid Neural Network-SEIR model for forecasting intensive care occupancy in Switzerland during COVID-19 epidemics. *PLOS One*. 2022;17(3):e0263789.
22. Moghadas SM, Shoukat A, Fitzpatrick MC, Wells CR, Sah P, Pandey A, et al. Projecting hospital utilization during the COVID-19 outbreaks in the United States. *Proceedings of the National Academy of Sciences*. 2020 Apr 21;117(16):9122–6.

23. Davies NG, Klepac P, Liu Y, Prem K, Jit M, Eggo RM. Age-dependent effects in the transmission and control of COVID-19 epidemics. *Nat Med*. 2020 Aug;26(8):1205–11.
24. Reiner RC, Barber RM, Collins JK, Zheng P, Adolph C, Albright J, et al. Modeling COVID-19 scenarios for the United States. *Nat Med*. 2021 Jan;27(1):94–105.
25. Qiu T, Xiao H, Brusica V. Estimating the Effects of Public Health Measures by SEIR(MH) Model of COVID-19 Epidemic in Local Geographic Areas. *Front Public Health*. 2021;9:728525.
26. Berger D, Herkenhoff K, Huang C, Mongey S. Testing and reopening in an SEIR model. *Review of Economic Dynamics*. 2022 Jan 1;43:1–21.
27. Chang S, Pierson E, Koh PW, Gerardin J, Redbird B, Grusky D, et al. Mobility network models of COVID-19 explain inequities and inform reopening. *Nature*. 2021 Jan;589(7840):82–7.
28. Rawson T, Brewer T, Veltcheva D, Huntingford C, Bonsall MB. How and When to End the COVID-19 Lockdown: An Optimization Approach. *Frontiers in Public Health*. 2020;8:262.
29. Abernethy GM, Glass DH. Optimal COVID-19 lockdown strategies in an age-structured SEIR model of Northern Ireland. *Journal of The Royal Society Interface*. 19(188):20210896.
30. Smith DRM, Duval A, Pouwels KB, Guillemot D, Fernandes J, Huynh BT, et al. Optimizing COVID-19 surveillance in long-term care facilities: a modelling study. *BMC Med*. 2020 Dec 8;18(1):386.
31. Larremore DB, Wilder B, Lester E, Shehata S, Burke JM, Hay JA, et al. Test sensitivity is secondary to frequency and turnaround time for COVID-19 screening. *Science Advances*. 2021 Jan;7(1):eabd5393.
32. Lokuge K, Banks E, Davis S, Roberts L, Street T, O'Donovan D, et al. Exit strategies: optimising feasible surveillance for detection, elimination, and ongoing prevention of COVID-19 community transmission. *BMC Medicine*. 2021 Feb 17;19(1):50.
33. Runge M, Richardson RAK, Clay PA, Bell A, Holdenid TM, Singam M, et al. Modeling robust COVID-19 intensive care unit occupancy thresholds for imposing mitigation to prevent exceeding capacities. *PLOS Global Public Health*. 2022 May;2(5):e0000308.
34. Wang D, Hu B, Hu C, Zhu F, Liu X, Zhang J, et al. Clinical Characteristics of 138 Hospitalized Patients With 2019 Novel Coronavirus-Infected Pneumonia in Wuhan, China. *JAMA*. 2020 Mar 17;323(11):1061–9.
35. Bi Q, Wu Y, Mei S, Ye C, Zou X, Zhang Z, et al. Epidemiology and transmission of COVID-19 in 391 cases and 1286 of their close contacts in Shenzhen, China: a retrospective cohort study. *The Lancet Infectious Diseases*. 2020 Aug;20(8):911–9.



36. The Institute for Disease Modeling. Compartmental Modeling Software (CMS) [Internet]. 2018 [cited 2022 Aug 25]. Available from: <https://docs.idmod.org/projects/cms/en/latest/index.html#>
37. Northwestern University Malaria Modelling Team. Modelling the COVID-19 pandemic in Illinois [Internet]. NU Malaria Modeling Team; 2021 [cited 2022 Aug 25]. Available from: <https://github.com/numalariamodeling/covid-chicago>
38. Hladish T, Melamud E, Barrera LA, Galvani A, Meyers LA. EpiFire: An open source C++ library and application for contact network epidemiology. *BMC Bioinformatics*. 2012 May 4;13(1):76.
39. Northwestern University Malaria Modelling Team. Modeling sentinel surveillance [Internet]. 2021 [cited 2022 Aug 25]. Available from: <https://github.com/numalariamodeling/covid-sentinel-surveil>
40. City of Chicago. Latest Data | COVID 19 [Internet]. [cited 2022 Aug 17]. Available from: <https://www.chicago.gov/city/en/sites/covid-19/home/covid-dashboard.html>
41. McGough SF, Johansson MA, Lipsitch M, Menzies NA. Nowcasting by Bayesian Smoothing: A flexible, generalizable model for real-time epidemic tracking. *PLOS Computational Biology*. 2020 Apr;16(4):e1007735.
42. Höhle M, an der Heiden M. Bayesian nowcasting during the STEC O104:H4 outbreak in Germany, 2011. *Biometrics*. 2014;70(4):993–1002.
43. Hilfiker L, Josi J. epyestim [Internet]. 2020. Available from: <https://pypi.org/project/epyestim/>
44. Huisman JS, Scire J, Angst DC, Li J, Neher RA, Maathuis MH, et al. Estimation and worldwide monitoring of the effective reproductive number of SARS-CoV-2. *eLife*. 2022 Aug;11:e71345.
45. Cori A, Ferguson NM, Fraser C, Cauchemez S. A new framework and software to estimate time-varying reproduction numbers during epidemics. *Am J Epidemiol*. 2013 Nov 1;178(9):1505–12.
46. United States Census Bureau. Census Bureau Data [Internet]. [cited 2022 Aug 16]. Available from: <https://data.census.gov/cedsci/>
47. Prem K, Cook AR, Jit M. Projecting social contact matrices in 152 countries using contact surveys and demographic data. *PLOS Computational Biology*. 2017 Sep 12;13(9):e1005697.
48. Mistry D, Litvinova M, Pastore y Piontti A, Chinazzi M, Fumanelli L, Gomes MFC, et al. Inferring high-resolution human mixing patterns for disease modeling. *Nat Commun*. 2021 Jan 12;12(1):323.

49. CDC. Risk for COVID-19 Infection, Hospitalization, and Death By Age Group [Internet]. [cited 2022 Aug 18]. Available from: <https://www.cdc.gov/coronavirus/2019-ncov/covid-data/investigations-discovery/hospitalization-death-by-age.html>
50. Li T, White LF. Bayesian back-calculation and nowcasting for line list data during the COVID-19 pandemic. *PLOS Computational Biology*. 2021 Jul 12;17(7):e1009210.
51. Bastos LS, Economou T, Gomes MFC, Villela DAM, Coelho FC, Cruz OG, et al. A modelling approach for correcting reporting delays in disease surveillance data. *Statistics in Medicine*. 2019 Sep;38(22):4363–77.
52. van de Kastele J, Eilers PHC, Wallinga J. Nowcasting the Number of New Symptomatic Cases During Infectious Disease Outbreaks Using Constrained P-spline Smoothing. *Epidemiology*. 2019 Sep;30(5):737–45.
53. City of Chicago. Daily COVID-19 Hospitalizations by Age | Chicago Data Portal [Internet]. [cited 2022 Aug 17]. Available from: <https://data.cityofchicago.org/Health-Human-Services/Daily-COVID-19-Hospitalizations-by-Age/g43c-xce5>
54. Drolet M, Godbout A, Mondor M, Béraud G, Drolet-Roy L, Lemieux-Mellouki P, et al. Time trends in social contacts before and during the COVID-19 pandemic: the CONNECT study. *BMC Public Health*. 2022 May 23;22:1032.
55. CDC. Estimated COVID-19 Burden [Internet]. [cited 2022 Aug 16]. Available from: <https://www.cdc.gov/coronavirus/2019-ncov/cases-updates/burden.html>
56. Reese H, Iuliano AD, Patel NN, Garg S, Kim L, Silk BJ, et al. Estimated Incidence of Coronavirus Disease 2019 (COVID-19) Illness and Hospitalization—United States, February–September 2020. *Clinical Infectious Diseases*. 2021 Jun 15;72(12):e1010–7.
57. Iuliano AD, Chang HH, Patel NN, Threlkel R, Kniss K, Reich J, et al. Estimating under-recognized COVID-19 deaths, United States, march 2020–may 2021 using an excess mortality modelling approach. *The Lancet Regional Health – Americas*. 2021 Sep 1;1:100019.
58. Pullano G, Di Domenico L, Sabbatini CE, Valdano E, Turbelin C, Debin M, et al. Underdetection of cases of COVID-19 in France threatens epidemic control. *Nature*. 2021 Feb;590(7844):134–9.
59. Omori R, Mizumoto K, Nishiura H. Ascertainment rate of novel coronavirus disease (COVID-19) in Japan. *International Journal of Infectious Diseases*. 2020 Jul 1;96:673–5.
60. Pouwels KB, House T, Pritchard E, Robotham JV, Birrell PJ, Gelman A, et al. Community prevalence of SARS-CoV-2 in England from April to November, 2020: results from the ONS Coronavirus Infection Survey. *The Lancet Public Health*. 2021 Jan 1;6(1):e30–8.

61. ZOE. ZOE Health Study [Internet]. [cited 2022 Aug 18]. Available from: <https://health-study.joinzoe.com/>
62. COVID Symptom. COVID Symptom [Internet]. [cited 2022 Aug 18]. Available from: <https://www.covidsymptom.org/>
63. COVID Control. COVID Control- A Johns Hopkins University Study [Internet]. [cited 2022 Aug 18]. Available from: <https://covidcontrol.jhu.edu/>
64. Janvrin ML, Korona-Bailey J, Koehlmoos TP. Re-examining COVID-19 Self-Reported Symptom Tracking Programs in the United States: Updated Framework Synthesis. JMIR Form Res. 2021 Dec 6;5(12):e31271.
